# Supplementary material for: Inhibition of Hyperglycemia and Hyperlipidemia by Blocking Toll-like Receptor 4: Comparison of Wild-Type and Toll-like Receptor 4 Gene Knockout Mice on Obesity and Diabetes Modeling
Source: MDPI journal article supplement (doi:10.3390/biology13010063), 2024-01-22
Supplement: s1 [file s1]

## Supplementary Materials

**Table S1.** The composition of feeds.

| Composition                                      | Normal feed     |            | 45% High-fat feed |            | 60% High-fat feed |            |
|--------------------------------------------------|-----------------|------------|-------------------|------------|-------------------|------------|
|                                                  | Energy supply   | Quality    | Energy supply     | Quality    | Energy supply     | Quality    |
|                                                  | proportion      | proportion | proportion        | proportion | proportion        | proportion |
|                                                  | (calorie ratio) |            | (calorie ratio)   |            | (calorie ratio)   |            |
| Fat                                              | 10%             | 4.5%       | 45%               | 23.6%      | 60%               | 35%        |
| Protein                                          | 20%             | 23%        | 20%               | 23.7%      | 20%               | 26%        |
| Carbohydrates (including fructose and cellulose) | 70%             | 40.9%      | 35%               | 41.4%      | 20%               | 36%        |

**Table S2.** The detail ingredients of mice high-fat feeds.

|                      | 45% High-fat feed |         | 60% High-fat feed |         |
|----------------------|-------------------|---------|-------------------|---------|
|                      | Energy supply     | Quality | Energy supply     | Quality |
|                      | / kcal            | / gm    | / kcal            | / gm    |
| Casein               | 800               | 200     | 800               | 200     |
| L-Cytine             | 12                | 3       | 12                | 3       |
| Corn Starch          | 291               | 72.8    | 0                 | 0       |
| Maltodextrin         | 400               | 100     | 500               | 125     |
| Sucrose              | 691.2             | 172.8   | 275               | 68.8    |
| Cellulose            | 0                 | 50      | 0                 | 50      |
| Soybean oil          | 225               | 25      | 225               | 25      |
| Lard                 | 1598              | 177.5   | 2205              | 245     |
| Mineral Mix S10026   | 0                 | 10      | 0                 | 10      |
| DiCalcium Phosphate  | 0                 | 13      | 0                 | 13      |
| Calcium Carbonate    | 0                 | 5.5     | 0                 | 5.5     |
| Potassium Citrate, 1 | 0                 | 16.5    | 0                 | 16.5    |
| H <sub>2</sub> O     |                   |         |                   |         |
| Vitamin Mix V10001   | 40                | 10      | 40                | 10      |
| Choline Bitartrate   | 0                 | 2       | 0                 | 2       |

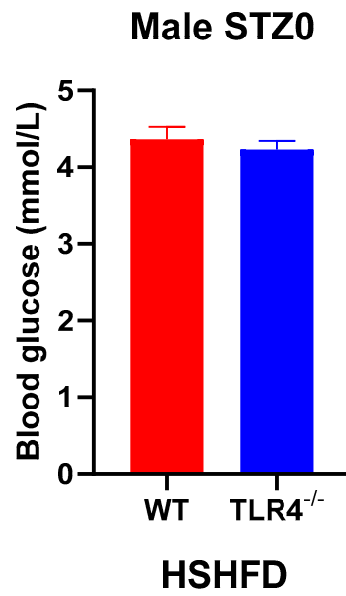

**Figure S1.** Comparison on blood glucose of male mice before the first streptozotocin (STZ) injection between wild type (WT) and TLR4 gene knockout (TLR4<sup>-/-</sup>) mice. Data are represented as the mean  $\pm$  standard error of mean (SEM, n = 27-63).
